# Supplementary material for: Towards allosteric receptors – synthesis of β-cyclodextrin-functionalised 2,2’-bipyridines and their metal complexes
Source: publisher site journal article supplement (doi:10.3762/bjoc.10.77), 2014-04-09
Supplement: Additional file 1 [file 1860-5397-10-77-S1.pdf]

# Supporting Information

for

## **Towards allosteric receptors – synthesis of $\beta$ -cyclodextrin-functionalised 2,2'-bipyridines and their metal complexes**

Christopher Kremer<sup>1</sup>, Gregor Schnakenburg<sup>2</sup> and Arne Lützen<sup>\*1</sup>

Address: <sup>1</sup>University of Bonn, Kekulé-Institute of Organic Chemistry and Biochemistry, Gerhard-Domagk-Str. 1, D-53121 Bonn, Germany and <sup>2</sup>University of Bonn, Institute of Inorganic Chemistry, Gerhard-Domagk-Str. 1, D-53121 Bonn, Germany

Email: Arne Lützen - arne.luetzen@uni-bonn.de

\* Corresponding author

### **Experimental data, NMR and ESI mass spectra**

- Experimental part
- NMR spectra of compounds **1**, **2**, **3**, **21**, **22** and **6** and the metal complexes of **1**, **2**, **3**, **14**, and **22**.
- Mass spectra of metal complexes of **1**, **2**, **14**, and **22**.

## Experimental

**General remarks:** All solvents were distilled and dried prior to use according to standard procedures. All syntheses with air- and moisture-sensitive compounds were performed using Schlenk techniques under argon atmosphere. Column chromatography was performed on silica gel 60 M (0.04–0.063 mm) from Macherey-Nagel. All solvents used as eluents for column chromatography were distilled prior to use.  $^1\text{H}$  and  $^{13}\text{C}$  NMR spectra were recorded at 293 K on a Bruker AM 300 ( $^1\text{H}$ : 300.1 MHz,  $^{13}\text{C}$ : 75.5 MHz) or a Bruker AM 400 ( $^1\text{H}$ : 400.1 MHz,  $^{13}\text{C}$ : 100.6 MHz).  $^1\text{H}$  NMR chemical shifts are reported on the  $\delta$  scale (ppm) relative to residual non-deuterated solvent as internal standard.  $^{13}\text{C}$  NMR chemical shifts are given as  $\delta$  values (ppm) relative to signals of the deuterated solvent as internal standards. Mass spectra were taken on a Bruker autoflex II TOF/TOF (MALDI) or a Bruker micrOTOF-Q (ESI, Hi-Res-ESI). Elemental analyses were carried out on a Heraeus Vario EL. Chemicals and reagents (except for the solvents) obtained from commercial sources were used as received. The following compounds were prepared according to published procedures: pyrrole-substituted 2-halogenopyridines **6** and **7**,<sup>[1]</sup> bis(pyrrole)-substituted 2,2'-bipyridines **8** and **9**<sup>[1]</sup> as well as **10**<sup>[2]</sup>, diamino-2,2'-bipyridines **11**–**13**<sup>[1]</sup>, diisothiocyanato-2,2'-bipyridines **14**–**16**<sup>[3]</sup>, 6<sup>A</sup>-O-p-toluenesulfonyl- $\beta$ -cyclodextrin (**18**)<sup>[4]</sup>, 6<sup>A</sup>-azido-6<sup>A</sup>-deoxy- $\beta$ -cyclodextrin (**19**)<sup>[5]</sup>, 2<sup>A</sup>,2<sup>B</sup>,2<sup>C</sup>,2<sup>D</sup>,2<sup>E</sup>,2<sup>F</sup>,2<sup>G</sup>,3<sup>A</sup>,3<sup>B</sup>,3<sup>C</sup>,3<sup>D</sup>,3<sup>E</sup>,3<sup>F</sup>,3<sup>G</sup>,6<sup>B</sup>,6<sup>C</sup>,6<sup>D</sup>,6<sup>E</sup>,6<sup>F</sup>,6<sup>G</sup>-icosa-O-acetyl-6<sup>A</sup>-azido-

<sup>1</sup> Kiehne U.; Bunzen, J.; Staats, H.; Lützen, A. *Synthesis* **2007**, 1061–1069.

<sup>2</sup> Hapke, M.; Staats, H.; Wallmann, I.; Lützen, A. *Synthesis* **2007**, 2711–2719.

<sup>3</sup> Kremer, C.; Lützen, A. *Synthesis* **2011**, 210–212.

<sup>4</sup> Lee, T.; Lim, J.; Chung, I.; Kim, I.; Ha, C.-S. *Macromol. Res.* **2010**, 18, 120–128.

<sup>5</sup> Hbaieb, S.; Kalfat, R.; Chevalier, Y.; Amdouni, N.; Parrot-Lopez, H. *Mat. Sci. Eng. C* **2008**, 28, 697–704.

6<sup>A</sup>-desoxy- $\beta$ -cyclodextrin (**20**)<sup>[6]</sup>, 6,7-dihydro-5*H*-[1,4]di-azepino[1,2,3,4-*l,m,n*][1,10]-phenanthroline-4,8-diium dibromide (**23**)<sup>[7]</sup>, 3,6,7,9-tetrahydro-5*H*-[1,4]diazepino-[1,2,3,4-*l,m,n*][1,10]-phenanthroline-3,9-dione (**24**)<sup>[7]</sup>, 2,9-dichloro-1,10-phenanthroline (**25**)<sup>[8]</sup>, 2,6-dimethoxyphenylboronic acid (**26**)<sup>[9]</sup>, and 2,9-bis(2,6-dimethoxyphenyl)-1,10-phenanthroline (**22**)<sup>[10-12]</sup>.

**2<sup>A</sup>,2<sup>B</sup>,2<sup>C</sup>,2<sup>D</sup>,2<sup>E</sup>,2<sup>F</sup>,2<sup>G</sup>,3<sup>A</sup>,3<sup>B</sup>,3<sup>C</sup>,3<sup>D</sup>,3<sup>E</sup>,3<sup>F</sup>,3<sup>G</sup>,6<sup>B</sup>,6<sup>C</sup>,6<sup>D</sup>,6<sup>E</sup>,6<sup>F</sup>,6<sup>G</sup>-Icosa-O-acetyl-6<sup>A</sup>-amino-6<sup>A</sup>-desoxy- $\beta$ -cyclodextrin (21):** 3.92 g (1.96 mmol) of peracetylated azidocyclodextrin **20** were dissolved in 12 mL of dry acetone and 1.03 g (3.95 mmol) PPh<sub>3</sub> were added. The reaction mixture was stirred for two hours at rt, followed by the addition of 1 mL of water. After 30 minutes of reflux, the solvents were evaporated, the crude product was dissolved in dichloromethane and washed with water. After drying with MgSO<sub>4</sub>, the solvents were evaporated. Further purification could be achieved by column chromatography on silica gel (eluent: dichloromethane/EtOH 96:4 + 0.5% NEt<sub>3</sub>, *R<sub>f</sub>* = 0.32) to give 2.34 g (1.18 mmol, 60%) of the desired product as a white solid.

Mp (°C): 150°C. <sup>1</sup>H NMR (300.1 MHz, CDCl<sub>3</sub>):  $\delta$  [ppm] = 5.23-5.40 (m, 7H, H-3<sup>A-G</sup>); 5.17 (d, <sup>3</sup>*J* = 3.8 Hz, 1H, H-1<sup>A</sup>); 5.03-5.35 (m, 6H, H-1<sup>B-G</sup>); 4.72-4.86 (m, 7H, H-2<sup>A-G</sup>); 4.48-4.62 (m, 6H, H-6<sup>B-G</sup>); 4.19-4.35 (m, 6H, H-6<sup>B-G</sup>); 4.02-4.19 (m, 7H, H-5<sup>A-G</sup>); 3.82-3.98 (m, 2H, H-6<sup>A</sup>), 3.64-3.77 (m, 7H, H-4<sup>A-G</sup>); 1.95-2.20 (m, 60H, -COOMe). <sup>13</sup>C NMR (75.5 MHz, CDCl<sub>3</sub>):  $\delta$  [ppm] = 169.38-170.77 (-COOMe); 96.79-98.42 (C-1<sup>A-G</sup>); 76.51-77.40 (C-4<sup>A-G</sup>); 69.38-71.24 (C-2<sup>A-G</sup>, C-3<sup>A-G</sup>, C-5<sup>A-G</sup>); 62.44-62.78

<sup>6</sup> Sallas, F.; Marsura, A.; Petot, V. *Helv. Chim. Acta* **1998**, *81*, 632–645.

<sup>7</sup> Yamada, M.; Nakamura, Y.; Kuroda, S.; Shimano, I. *Bull. Chem. Soc. Jpn.* **1990**, *63*, 2710–2712.

<sup>8</sup> Frey, J.; Kraus, T.; Heitz, V.; Sauvage, J.-P. *Chem. Eur. J.* **2007**, *13*, 7584–7594.

<sup>9</sup> Nishimura, N.; Yoza, K.; Kobayashi, K. *J. Am. Chem. Soc.* **2010**, *132*, 777–790.

<sup>10</sup> Lüning, U.; Abbass, M.; Fahrenkrug, F. *Eur. J. Org. Chem.* **2002**, *19*, 3294–3303.

<sup>11</sup> Cacciapaglia, R.; Di Stefano, S.; Fahrenkrug, F.; Lüning, U.; Mandolini, L. *J. Phys. Org. Chem.* **2004**, *17*, 350–355.

<sup>12</sup> Lüning, U.; Fahrenkrug, F. *Eur. J. Org. Chem.* **2004**, 3119–3127.

(C-6<sup>B-G</sup>); 41.59 (C-6<sup>A</sup>); 20.77 (-COOMe). MS (ESI (+)):  $m/z$  = 1974.4 ([**(7)**+H]<sup>+</sup>); 999.2 ([**(7)**+H+Na]<sup>2+</sup>). Elemental analysis: calcd. for C<sub>82</sub>H<sub>111</sub>NO<sub>54</sub> (%): C, 49.87; H, 5.67; N, 0.71; found (%): C, 49.53; H, 5.90; N, 0.89.

***N,N'*-(2,2'-Bipyridine)-4,4'-diylbis(*N*-2<sup>A</sup>,2<sup>B</sup>,2<sup>C</sup>,2<sup>D</sup>,2<sup>E</sup>,2<sup>F</sup>,2<sup>G</sup>,3<sup>A</sup>,3<sup>B</sup>,3<sup>C</sup>,3<sup>D</sup>,3<sup>E</sup>,3<sup>F</sup>,3<sup>G</sup>,6<sup>B</sup>,6<sup>C</sup>,6<sup>D</sup>,6<sup>E</sup>,6<sup>F</sup>,6<sup>G</sup>-icosa-O-acetyl-6<sup>A</sup>-desoxy-β-cyclodextrin-6<sup>A</sup>-yl)thiourea) (1)**

0.05 g (0.2 mmol) of 4,4'-diisothiocyanato-2,2'-bipyridine (**14**) and 0.9 g (0.46 mmol, 2.3 equiv) of 2<sup>A</sup>,2<sup>B</sup>,2<sup>C</sup>,2<sup>D</sup>,2<sup>E</sup>,2<sup>F</sup>,2<sup>G</sup>,3<sup>A</sup>,3<sup>B</sup>,3<sup>C</sup>,3<sup>D</sup>,3<sup>E</sup>,3<sup>F</sup>,3<sup>G</sup>,6<sup>B</sup>,6<sup>C</sup>,6<sup>D</sup>,6<sup>E</sup>,6<sup>F</sup>,6<sup>G</sup>-icosa-O-acetyl-6<sup>A</sup>-amino-6<sup>A</sup>-desoxy-β-cyclodextrin (**21**) were dissolved in 20 mL of dry dichloromethane and stirred for 24 hours at rt, followed by evaporation of the solvent. Column chromatography on silica gel (eluent: dichloromethane:EtOH 96:4,  $R_f$  = 0.32) gave 0.77 g (0.18 mmol, 92%) of the desired product as a slightly off-white amorphous solid.

<sup>1</sup>H NMR (300.1 MHz, CDCl<sub>3</sub>):  $\delta$  [ppm] = 8.87 (b, 2H, NH); 8.46 (d, <sup>3</sup> $J$  = 5.7 Hz, 2H, H-6<sub>Bipy</sub>); 8.13 (s, 2H, H-3<sub>Bipy</sub>); 7.97 (b, 2H, H-5<sub>Bipy</sub>); 6.89 (b, 2H, NH); 5.22-5.45 (m, 14H, H-3<sup>A-G</sup>); 4.96-5.24 (m, 14H, H-1<sup>A-G</sup>); 4.69-4.93 (m, 14H, H-2<sup>A-G</sup>), 3.93-4.66 (m, 38H, H-5<sup>A-G</sup>, H-6<sup>B-G</sup>); 3.61-3.88 (m, 18H, H-6<sup>A</sup>; H-4<sup>A-G</sup>); 1.91-2.28 (m, 120H, -COOMe). <sup>13</sup>C NMR (75.5 MHz, CDCl<sub>3</sub>):  $\delta$  [ppm] = 180.5 (C=S); 169.4-171.3 (-COOMe); 155.9 (C-4<sub>Bipy</sub>); 150.0 (C-2<sub>Bipy</sub>); 147.2 (C-6<sub>Bipy</sub>); 114.6 (C-5<sub>Bipy</sub>); 111.8 (C-3<sub>Bipy</sub>); 96.3-98.1 (C-1<sup>A-G</sup>); 76.5-77.4 (C-4<sup>A-G</sup>); 69.5-71.8 (C-2<sup>A-G</sup>, C-3<sup>A-G</sup>, C-5<sup>A-G</sup>); 62.4-63.1 (C-6<sup>A-G</sup>); 20.6 (-COOMe). MS (MALDI-TOF):  $m/z$  = 4219.8 ([**(1)**+H]<sup>+</sup>). Elemental analysis: calcd. for C<sub>176</sub>H<sub>228</sub>N<sub>6</sub>O<sub>108</sub>S<sub>2</sub> · 7 CH<sub>2</sub>Cl<sub>2</sub> (%): C, 45.66; H, 5.07; N, 1.75; S, 1.33; found (%): C, 45.82; H, 5.12; N, 1.85; S, 1.82.

***N,N'*-(2,2'-Bipyridine)-6,6'-diylbis(*N*-2<sup>A</sup>,2<sup>B</sup>,2<sup>C</sup>,2<sup>D</sup>,2<sup>E</sup>,2<sup>F</sup>,2<sup>G</sup>,3<sup>A</sup>,3<sup>B</sup>,3<sup>C</sup>,3<sup>D</sup>,3<sup>E</sup>,3<sup>F</sup>,3<sup>G</sup>,  
6<sup>B</sup>,6<sup>C</sup>,6<sup>D</sup>,6<sup>E</sup>,6<sup>F</sup>,6<sup>G</sup>-icosa-O-acetyl-6<sup>A</sup>-desoxy-β-cyclodextrin-6<sup>A</sup>-yl)thiourea) (2)**

0.02 g (0.07 mmol) of 6,6'-diisothiocyanato-2,2'-bipyridine (**15**) and 0.34 g (0.17 mmol, 2.3 equiv) of 2<sup>A</sup>,2<sup>B</sup>,2<sup>C</sup>,2<sup>D</sup>,2<sup>E</sup>,2<sup>F</sup>,2<sup>G</sup>,3<sup>A</sup>,3<sup>B</sup>,3<sup>C</sup>,3<sup>D</sup>,3<sup>E</sup>,3<sup>F</sup>,3<sup>G</sup>,6<sup>B</sup>,6<sup>C</sup>,6<sup>D</sup>,6<sup>E</sup>,6<sup>F</sup>,6<sup>G</sup>-icosa-O-acetyl-6<sup>A</sup>-amino-6<sup>A</sup>-desoxy-β-cyclodextrin (**21**) were dissolved in 10 mL of dry dichloromethane and stirred for 48 hours at rt, followed by evaporation of the solvent. Column chromatography on silica gel (eluent: dichloromethane:EtOH 96:4, *R<sub>f</sub>* = 0.38) gave 0.29 g (0.069 mmol, 93%) of the desired product as a slightly off-white amorphous solid.

<sup>1</sup>H NMR (400.1 MHz, CDCl<sub>3</sub>): δ [ppm] = 11.81 (s, 2H, N-H); 8.97 (s, 2H, N-H); 7.77 (dd, <sup>3</sup>*J* = 7.9 Hz, 2H, H-4<sub>Bipy</sub>); 7.59 (d, <sup>3</sup>*J* = 7.9 Hz, 2H, H-3<sub>Bipy</sub>); 7.02 (d, <sup>3</sup>*J* = 7.9 Hz, 2H, H-5<sub>Bipy</sub>); 5.10-5.40 (m, 14H, H-3<sup>A-G</sup>); 4.91-5.09 (m, 14H, H-1<sup>A-G</sup>); 4.64-4.83 (m, 14H, H-2<sup>A-G</sup>); 3.88-4.27 (m, 38H, H-5<sup>A-G</sup>, H-6<sup>B-G</sup>); 3.42-3.81 (m, 18H, H-6<sup>A</sup>, H-4<sup>A-G</sup>); 1.82-2.52 (m, 120H, -COOMe). <sup>13</sup>C NMR (100.1 MHz, CDCl<sub>3</sub>): δ [ppm] = 180.2 (C=S); 169.2-171.5 (-COOMe); 153.0 (C-6<sub>Bipy</sub>); 151.8 (C-2<sub>Bipy</sub>); 139.6 (C-4<sub>Bipy</sub>); 114.9 (C-3<sub>Bipy</sub>); 113.4 (C-5<sub>Bipy</sub>); 96.3-97.5 (C-1<sup>A-G</sup>); 76.1-78.1 (C-4<sup>A-G</sup>); 68.5-72.0 (C-2<sup>A-G</sup>, C-3<sup>A-G</sup>, C-5<sup>A-G</sup>); 62.4-65.2 (C-6<sup>A-G</sup>); 20.8-21.1 (-COOMe). MS (MALDI-TOF): *m/z* = 4217.9 ([**(2)**+H]<sup>+</sup>). Elemental analysis: calcd. for C<sub>176</sub>H<sub>228</sub>N<sub>6</sub>O<sub>108</sub>S<sub>2</sub> · 2 CH<sub>2</sub>Cl<sub>2</sub> (%): C, 48.70; H, 5.33; N, 1.91; S, 1.46; found (%): C, 48.39; H, 5.48; N, 1.56; S, 1.85.

***N,N'*-(2,2'-Bipyridine)-4,6'-diylbis(*N*-2<sup>A</sup>,2<sup>B</sup>,2<sup>C</sup>,2<sup>D</sup>,2<sup>E</sup>,2<sup>F</sup>,2<sup>G</sup>,3<sup>A</sup>,3<sup>B</sup>,3<sup>C</sup>,3<sup>D</sup>,3<sup>E</sup>,3<sup>F</sup>,3<sup>G</sup>,  
6<sup>B</sup>,6<sup>C</sup>,6<sup>D</sup>,6<sup>E</sup>,6<sup>F</sup>,6<sup>G</sup>-icosa-O-acetyl-6<sup>A</sup>-desoxy-β-cyclodextrin-6<sup>A</sup>-yl)thiourea) (3)**

0.02 g (0.07 mmol) of 4,6'-diisothiocyanato-2,2'-bipyridine (**16**) and 0.34 g (0.17 mmol, 2.3 equiv) of 2<sup>A</sup>,2<sup>B</sup>,2<sup>C</sup>,2<sup>D</sup>,2<sup>E</sup>,2<sup>F</sup>,2<sup>G</sup>,3<sup>A</sup>,3<sup>B</sup>,3<sup>C</sup>,3<sup>D</sup>,3<sup>E</sup>,3<sup>F</sup>,3<sup>G</sup>,6<sup>B</sup>,6<sup>C</sup>,6<sup>D</sup>,6<sup>E</sup>,6<sup>F</sup>,6<sup>G</sup>-Icosa-O-acetyl-6<sup>A</sup>-amino-6<sup>A</sup>-desoxy-β-cyclodextrin were dissolved in 10 mL of dry dichloromethane and stirred for 48 hours at rt, followed by evaporation of the solvent.

Column chromatography on silica gel (eluent: dichloromethane:EtOH 96:4,  $R_f$  = 0.38) gave 0.27 g (0.06 mmol, 86%) of the desired product as a slightly off-white amorphous solid.

$^1\text{H}$  NMR (300.1 MHz,  $\text{CDCl}_3$ ):  $\delta$  [ppm] = 12.26 (b, 1H, N-H); 9.11 (s, 1H, H-3<sub>Bipy</sub>); 8.63 (b, 1H, N-H); 8.53 (d,  $^3J$  = 5.5 Hz, 1H, H-6<sub>Bipy</sub>); 8.30 (b, 1H, N-H); 7.95 (d,  $^3J$  = 7.9 Hz, 1H, H-3'<sub>Bipy</sub>); 7.69 (m, 2H, H-4'<sub>Bipy</sub>, H-5<sub>Bipy</sub>); 7.09 (b, 1H, N-H); 7.00 (d,  $^3J$  = 7.9 Hz, 1H, H-5'<sub>Bipy</sub>); 5.22-5.40 (m, 14H, H-3<sup>A-G</sup>); 4.96-5.22 (m, 14H, H-1<sup>A-G</sup>); 4.65-4.93 (m, 14H, H-2<sup>A-G</sup>); 4.03-4.63 (m, 38H, H-5<sup>A-G</sup>, H-6<sup>B-G</sup>); 3.57-3.91 (m, 18H, H-6<sup>A</sup>, H-4<sup>A-G</sup>); 1.75-2.23 (m, 120H, -COOMe).  $^{13}\text{C}$  NMR (75.5 MHz,  $\text{CDCl}_3$ ):  $\delta$  [ppm] = 180.1 (C=S); 169.1-171.1 (-COOMe); 155.3 (C-4<sub>Bipy</sub>); 152.7 (C-6'<sub>Bipy</sub>); 152.0 (C-2'<sub>Bipy</sub>); 150.5 (C-6<sub>Bipy</sub>); 147.2 (C-2<sub>Bipy</sub>); 139.7 (C-4'<sub>Bipy</sub>); 115.7 (C-3'<sub>Bipy</sub>); 115.0 (C-5<sub>Bipy</sub>); 113.0 (C-5'<sub>Bipy</sub>); 112.2 (C-3); 95.5-97.9 (C-1<sup>A-G</sup>); 75.9-78.4 (C-4<sup>A-G</sup>); 68.7-72.3 (C-2<sup>A-G</sup>, C-3<sup>A-G</sup>, C-5<sup>A-G</sup>); 62.0-63.1 (C-6<sup>A-G</sup>); 20.4 (-COOMe). MS (ESI(+)):  $m/z$  = 2132.5 ([**(3)**+Na]<sup>2+</sup>). Hi-Res-MS (ESI(+)): calcd. for  $[\text{C}_{176}\text{H}_{228}\text{N}_6\text{O}_{108}\text{S}_2\text{Na}_2]^+$ :  $m/z$  = 2131.5880; found:  $m/z$  = 2131.5813 ( $\Delta$  = 3.1 ppm). Elemental analysis: calcd for  $\text{C}_{176}\text{H}_{228}\text{N}_6\text{O}_{108}\text{S}_2$  (%): C, 50.09; H, 5.45; N, 1.99; S, 1.52; found (%): C, 49.72; H, 5.69; N, 1.58; S, 1.57.

### **[(CO)<sub>3</sub>Re(**14**)Cl]**

0.02 g (0.07 mmol) of **14** and 0.03 mg (0.016 mmol) pentacarbonylrhenium(I) chloride were dissolved in 2 mL  $\text{CHCl}_3$ . The solution was stirred at 40 °C. After 7 d, when  $^1\text{H}$  NMR measurements showed complete conversion, the solvent was evaporated.

$^1\text{H}$  NMR (300.1 MHz,  $\text{CDCl}_3$ ):  $\delta$  [ppm] = 8.98 (d,  $^3J$  = 6.0 Hz, 2H, H-6); 7.85 (d,  $^4J$  = 2.1 Hz, 2H, H-3); 7.31 (dd,  $^3J$  = 6.0 Hz,  $^4J$  = 2.1 Hz, 2H, H-5). MS (ESI (+)):  $m/z$  = 605.0 ([[(CO)<sub>3</sub>Re(**14**)]+2 MeOH]<sup>+</sup>); 623.0 ([[(CO)<sub>3</sub>Re(**14**)]+2 MeOH+H<sub>2</sub>O]<sup>+</sup>).

Hi-Res.-MS (ESI (+)): calcd. for  $[\text{C}_{15}\text{H}_6\text{N}_4\text{O}_3\text{ReS}_2(\text{CH}_3\text{OH})_2]^+$ :  $m/z = 604.9950$ ; found:  $m/z = 604.9940$  ( $\Delta = 1.7$  ppm).

### **[Zn(1)<sub>2</sub>](OTf)<sub>2</sub>**

0.7 mg (0.002 mmol) of  $\text{Zn}(\text{OTf})_2$  were dissolved in 0.5 mL of  $\text{C}_6\text{D}_6/\text{CD}_3\text{CN}$  (1:1). 0.3515 mL of this solution were transferred into a solution of 8 mg (0.002 mmol) of **1** in 0.1985 mL of  $\text{C}_6\text{D}_6/\text{CD}_3\text{CN}$  (1:1) and stirred for 1 h at 40 °C.

$^1\text{H}$  NMR (400.1 MHz,  $\text{C}_6\text{D}_6/\text{CD}_3\text{CN}$ ):  $\delta$  [ppm] = 9.58 (b, 2H, N-H); 8.66 (s, 2H, H-3<sub>Bipy</sub>); 8.57 (d,  $^3J = 6.1$  Hz, 2H, H-6<sub>Bipy</sub>); 8.39 (b, 2H, H-5<sub>Bipy</sub>); 7.6 (b, 2H, N-H); 5.32-5.43 (m, 14H, H-3<sup>A-G</sup>); 5.01-5.13 (m, 14H, H-1<sup>A-G</sup>); 4.70-4.83 (m, 14H, H-2<sup>A-G</sup>); 4.08-4.62 (m, 38H, H-5<sup>A-G</sup>, H-6<sup>B-G</sup>); 3.69-3.96 (m, 18H, H-6<sup>A</sup>, H-4<sup>A-G</sup>); 1.85-2.01 (m, 120H, -COOMe). MS (MALDI-TOF):  $m/z = 4432.4$   $\{[\text{Zn}(\mathbf{1})]\text{OTf}\}^+$ ; 8654.7  $\{[\text{Zn}(\mathbf{1})_2]\text{OTf}\}^+$ .

### **[Cu(2)]PF<sub>6</sub>**

2 mg (0.00537 mmol) of  $\text{Cu}(\text{MeCN})_4\text{PF}_6$  were dissolved in 0.5 mL of  $\text{C}_6\text{D}_6/\text{CD}_3\text{CN}$  (1:1). 0.177 mL of this solution were transferred into a solution of 8 mg (0.00186 mmol) of **2** in 0.423 mL of  $\text{C}_6\text{D}_6/\text{CD}_3\text{CN}$  (1:1). The yellow solution was stirred for 1 h at 40 °C.

$^1\text{H}$  NMR (400.1 MHz,  $\text{C}_6\text{D}_6/\text{CD}_3\text{CN}$ ):  $\delta$  [ppm] = 12.04 (b, 2H, N-H); 9.79 (b, 2H, N-H); 7.91 (m, 2H, H-4<sub>Bipy</sub>); 7.81 (m, 2H, H-3<sub>Bipy</sub>); 7.31 (m, 2H, H-5<sub>Bipy</sub>); 5.30-5.63 (m, 14H, H-3<sup>A-G</sup>); 5.03-5.25 (m, 14H, H-1<sup>A-G</sup>); 4.7-4.96 (m, 14H, H-2<sup>A-G</sup>), 4.10-4.70 (m, 38H, H-5<sup>A-G</sup>, H-6<sup>B-G</sup>); 3.73-4.05 (m, 18H, H-6<sup>A</sup>, H-4<sup>A-G</sup>); 1.90-2.25 (m, 120H, -COOMe). MS (MALDI-TOF):  $m/z = 4283.3$   $[\text{Cu}(\mathbf{2})]^+$ .

### **[Zn(2)](OTf)<sub>2</sub>**

1 mg (0.00275 mmol) of Zn(OTf)<sub>2</sub> were dissolved in 0.5 mL of C<sub>6</sub>D<sub>6</sub>/CD<sub>3</sub>CN (1:1). 0.338 mL of this solution were transferred into a solution of 8 mg (0.00186 mmol) **2** in 0.162 mL of C<sub>6</sub>D<sub>6</sub>/CD<sub>3</sub>CN (1:1) and stirred for 1 h at 40 °C.

<sup>1</sup>H NMR (400.1 MHz, C<sub>6</sub>D<sub>6</sub>/CD<sub>3</sub>CN):  $\delta$  [ppm] = 10.58 (s, 2H, N-H); 8.43 (s, 2H, N-H); 7.87 (dd, <sup>3</sup>*J* = 8.1 Hz, <sup>3</sup>*J* = 8.1 Hz, 2H, H-4<sub>Bipy</sub>); 7.70 (d, <sup>3</sup>*J* = 8.1 Hz, 2H, H-3<sub>Bipy</sub>); 7.33 (d, <sup>3</sup>*J* = 8.1 Hz, 2H, H-5<sub>Bipy</sub>); 5.35-5.50 (m, 14H, H-3<sup>A-G</sup>); 4.91-5.21 (m, 14H, H-1<sup>A-G</sup>); 4.68-4.95 (m, 14H, H-2<sup>A-G</sup>); 4.05-4.59 (m, 42H, H-5<sup>A-G</sup>, H-6<sup>A-G</sup>); 3.75-3.92 (m, 14H, H-4<sup>A-G</sup>); 1.82-2.08 (m, 120H, -COOMe). MS (ESI(+)): *m/z* = 1429.2 ([Zn(**2**)]+H)<sup>3+</sup>.

### **[Cu(22)]PF<sub>6</sub>**

5 mg (0.01341 mmol) of Cu(MeCN)<sub>4</sub>PF<sub>6</sub> were dissolved in 0.5 mL of C<sub>6</sub>D<sub>6</sub>/CD<sub>3</sub>CN (1:1). 0.297 mL of this solution were transferred into a solution of 3.6 mg (0.00796 mmol) of **22** in 0.5 mL of C<sub>6</sub>D<sub>6</sub>/CD<sub>3</sub>CN (1:1). A yellow solution was obtained.

<sup>1</sup>H NMR (400.1 MHz, C<sub>6</sub>D<sub>6</sub>/CD<sub>3</sub>CN 1:1):  $\delta$  [ppm] = 8.09 (d, <sup>3</sup>*J*<sub>3,4</sub> = 8.3 Hz, 2H, H-4); 7.54 (s, 2H, H-5); 7.52 (d, <sup>3</sup>*J*<sub>3,4</sub> = 8.3 Hz, 2H, H-3); 7.3 (dd, <sup>3</sup>*J*<sub>3',4'</sub> = 8.4 Hz, 2H, H-4'); 6.57 (d, <sup>3</sup>*J*<sub>3',4'</sub> = 8.4 Hz, 4H, H-3'); 3.43 (s, 12H, -OMe). MS (ESI(+)): *m/z* = 515.2 ([Cu(**22**)]<sup>+</sup>). Hi-Res.-MS (ESI(+)): calcd. for [C<sub>28</sub>H<sub>24</sub>CuN<sub>2</sub>O<sub>4</sub>]<sup>+</sup>: *m/z* = 515.1026; found: *m/z* = 515.1027 ( $\Delta$  = 0.2 ppm).

### **[Zn(22)<sub>2</sub>](OTf)<sub>2</sub>**

5 mg (0.014 mmol) of Zn(OTf)<sub>2</sub> were dissolved in 0.3 mL of C<sub>6</sub>D<sub>6</sub>/CD<sub>3</sub>CN (1:1). 0.289 mL of this solution were transferred into a solution of 5 mg (0.01105 mmol) of **22** in 0.4 mL of C<sub>6</sub>D<sub>6</sub>/CD<sub>3</sub>CN (1:1). The colourless solution was stirred at 40 °C for 1 h.

<sup>1</sup>H NMR (400.1 MHz, C<sub>6</sub>D<sub>6</sub>/CD<sub>3</sub>CN):  $\delta$  [ppm] = 8.34 (d, <sup>3</sup>*J*<sub>3,4</sub> = 8.4 Hz, 2H, H-4); 7.86 (s, 2H, H-5); 7.45 (d, <sup>3</sup>*J*<sub>3,4</sub> = 8.4 Hz, 2H, H-3); 7.45 (dd, <sup>3</sup>*J*<sub>3',4'</sub> = 8.4 Hz, 2H, H-4'); 6.70



(d,  $^3J_{3',4'} = 8.4$  Hz, 4H, H-3'); 3.31 (s, 12H, -OMe). MS (ESI (+)):  $m/z = 258.0$  ([M+Zn] $^{2+}$ ); 484.1 ([Zn(**22**) $_2$ ] $^{2+}$ ); 665.1 ([Zn(**11**)]OTf) $^{+}$ ). Hi-Res.-MS (ESI (+)): calcd. for [C<sub>29</sub>H<sub>24</sub>F<sub>3</sub>N<sub>2</sub>O<sub>7</sub>SZn] $^{+}$ :  $m/z = 665.0542$ ; found:  $m/z = 665.0522$  ( $\Delta = 3$  ppm).

### [Cu(1)(22)]PF<sub>6</sub>

2 mg (0.005366 mmol) of Cu(MeCN)<sub>4</sub>PF<sub>6</sub> were dissolved in 0.4 mL of C<sub>6</sub>D<sub>6</sub>/CD<sub>3</sub>CN (1:1). 0.3295 mL of this solution were transferred to a solution of 2 mg (0.00442 mmol) of **22** in 0.4 mL of C<sub>6</sub>D<sub>6</sub>/CD<sub>3</sub>CN (1:1). From this solution, 0.3129 mL were taken and added to a solution of 8 mg (0.001896 mmol) of **1** in 0.3 mL of C<sub>6</sub>D<sub>6</sub>/CD<sub>3</sub>CN (1:1). The resulting solution has a deep red colour.

<sup>1</sup>H NMR (400.1 MHz, C<sub>6</sub>D<sub>6</sub>/CD<sub>3</sub>CN):  $\delta$  [ppm] = 9.10 (b, 2H, N-H); 8.26 (b, 2H, H-3<sub>Bipy</sub>); 8.14 (d,  $^3J = 8.3$  Hz, 2H, H-4<sub>Phen</sub>); 7.85 (b, 2H, H-5<sub>Bipy</sub>); 7.82 (d,  $^3J = 5.7$  Hz, 2H, H-6<sub>Bipy</sub>); 7.60 (s, 2H, H-5<sub>Phen</sub>); 7.52 (d,  $^3J = 8.3$  Hz, 2H, H-3<sub>Phen</sub>); 7.19 (b, 2H, N-H); 6.79 (dd,  $^3J = 8.4$  Hz, 2H, H-4'<sub>Phen</sub>); 6.01 (d,  $^3J = 8.4$  Hz, 4H, H-3'<sub>Phen</sub>); 5.35-5.48 (m, 14H, H-3<sup>A-G</sup>); 5.02-5.18 (m, 14H, H-1<sup>A-G</sup>); 4.70-4.85 (m, 14H, H-2<sup>A-G</sup>); 4.05-4.55 (m, 38H, H-5<sup>A-G</sup>, H-6<sup>B-G</sup>); 3.69-3.92 (m, 18H, H-6<sup>A</sup>; H-4<sup>A-G</sup>); 3.21 (s, 12H, -OMe); 1.85-1.98 (m, 120H, -COOMe). MS (MALDI-TOF): 4735.9 ([Cu(1)(22)] $^{+}$ ).

### [Zn(1)(22)](OTf)<sub>2</sub>

2.5 mg (0.00688 mmol) of Zn(OTf)<sub>2</sub> were dissolved in 0.6 mL C<sub>6</sub>D<sub>6</sub>/CD<sub>3</sub>CN (1:1). 0.4821 mL of this solution were transferred into a solution of 2.5 mg (0.00553 mmol) of **22** in 0.6 mL C<sub>6</sub>D<sub>6</sub>/CD<sub>3</sub>CN (1:1). From this solution, 1.0211 mL were taken and added to a solution of 22 mg (0.005214 mmol) of **1** in 0.3 mL of C<sub>6</sub>D<sub>6</sub>/CD<sub>3</sub>CN (1:1). The colourless mixture was stirred for 1 h at 40 °C.

<sup>1</sup>H NMR (400.1 MHz, C<sub>6</sub>D<sub>6</sub>/CD<sub>3</sub>CN):  $\delta$  [ppm] = 9.79 (b, 2H, N-H); 8.54 (s, 2H, H-3<sub>Bipy</sub>); 8.41 (d,  $^3J = 8.4$  Hz, 2H, H-4<sub>Phen</sub>); 8.17 (d,  $^3J = 6.0$  Hz, 2H, H-6<sub>Bipy</sub>); 7.92 (s,

2H, H-5<sub>Phen</sub>); 7.75 (b, 2H, N-H); 7.67 (d,  $^3J = 8.4$  Hz, 2H, H-3<sub>Phen</sub>); 7.66 (d,  $^3J = 6.0$  Hz, 2H, H-5<sub>Bipy</sub>); 6.92 (dd,  $^3J = 8.4$  Hz, 2H, H-4'<sub>Phen</sub>); 6.13 (m, 4H, H-3'<sub>Phen</sub>); 5.35-5.50 (m, 14H, H-3<sup>A-G</sup>); 5.02-5.19 (m, 14H, H-1<sup>A-G</sup>); 4.68-4.80 (m, 14H, H-2<sup>A-G</sup>); 4.10-4.48 (m, 42H, H-5<sup>A-G</sup>, H-6<sup>A-G</sup>); 3.75-3.90 (m, 14H, H-6<sup>A</sup>, H-4<sup>A-G</sup>); 3.19 (s, 12H, -OMe); 1.86-1.98 (m, 120H, -COOMe). MS (MALDI-TOF):  $m/z = 4884.6$  {[Zn(**1**)(**22**)]OTf}<sup>+</sup>.

**Crystal structure determination:** The data collection was performed on a NONIUS KappaCCD diffractometer (area detector) using graphite monochromated Mo  $K_\alpha$  radiation ( $\lambda = 0.71073$  Å). The diffractometer was equipped with a low-temperature device (Cryostream 600er series, Oxford Cryosystems, 123(2) K). Intensities were measured by fine-slicing  $\omega$  and  $\phi$ -scans and corrected for background, polarization and Lorentz effects.

An empirical absorption correction was applied for all data sets according to Blessing's method.<sup>[13]</sup> The structures were solved by direct methods and refined anisotropically by the least-squares procedure implemented in the ShelX program system.<sup>[14]</sup> Hydrogen atoms were included isotropically using the riding model on the bound carbon atoms.

CCDC-974931 ([ $(\text{CO})_3\text{Re}(\mathbf{14})\text{Cl}$ ]), CCDC-974932 ([Cu(**22**)(H<sub>3</sub>CCN)<sub>2</sub>]PF<sub>6</sub>), and CCDC-974933 ([Zn(**22**)<sub>2</sub>](OTf)<sub>2</sub>) contain the supplementary crystallographic data for this paper, which can be obtained free of charge from The Cambridge Crystallographic Data Centre via [www.ccdc.cam.ac.uk/data\\_request/cif](http://www.ccdc.cam.ac.uk/data_request/cif).

<sup>13</sup> Blessing, R. H. *Acta Cryst.*, **1995**, A61, 33–38

<sup>14</sup> Sheldrick, G. M.; *SHELXS97* and *SHELXL97*, University of Göttingen, Germany, **1997**.

**Table S1:** Crystallographic data for [(CO)<sub>3</sub>Re(**14**)Cl], [Cu(**22**)(H<sub>3</sub>CCN)<sub>2</sub>]PF<sub>6</sub>, and [Zn(**22**)<sub>2</sub>](OTf)<sub>2</sub>.

| Parameters                                       | [(CO) <sub>3</sub> Re( <b>14</b> )Cl]                                                         | [Cu( <b>22</b> )(H <sub>3</sub> CCN) <sub>2</sub> ]PF <sub>6</sub>               | [Zn( <b>22</b> ) <sub>2</sub> ](OTf) <sub>2</sub>                                               |
|--------------------------------------------------|-----------------------------------------------------------------------------------------------|----------------------------------------------------------------------------------|-------------------------------------------------------------------------------------------------|
| formula                                          | C <sub>16</sub> H <sub>7</sub> Cl <sub>4</sub> N <sub>4</sub> O <sub>3</sub> ReS <sub>2</sub> | C <sub>32</sub> H <sub>30</sub> CuF <sub>6</sub> N <sub>4</sub> O <sub>4</sub> P | C <sub>58</sub> H <sub>48</sub> F <sub>6</sub> N <sub>4</sub> O <sub>14</sub> S <sub>2</sub> Zn |
| M <sub>r</sub>                                   | 695.38                                                                                        | 743.11                                                                           | 1268.49                                                                                         |
| T [K]                                            | 123(2)                                                                                        | 123(2)                                                                           | 123.2(1)                                                                                        |
| crystal system                                   | monoclinic                                                                                    | triclinic                                                                        | triclinic                                                                                       |
| space group                                      | P 2 <sub>1</sub> /c                                                                           | P -1                                                                             | P -1                                                                                            |
| crystal dimensions [mm]                          | 0.32 × 0.18 × 0.08                                                                            | 0.28 × 0.20 × 0.02                                                               | 0.40 × 0.12 × 0.08                                                                              |
| a [Å]                                            | 11.7253(2)                                                                                    | 11.1033(8)                                                                       | 10.6987(2)                                                                                      |
| b [Å]                                            | 17.6132(3)                                                                                    | 12.4397(9)                                                                       | 12.9294(3)                                                                                      |
| c [Å]                                            | 11.6498(2)                                                                                    | 13.5810(10)                                                                      | 19.7165(4)                                                                                      |
| α [°]                                            | 90                                                                                            | 66.770(2)                                                                        | 90.5060(12)                                                                                     |
| β [°]                                            | 115.0710(10)                                                                                  | 87.495(2)                                                                        | 92.8121(14)                                                                                     |
| γ [°]                                            | 90                                                                                            | 71.359(2)                                                                        | 101.5840(12)                                                                                    |
| V [Å <sup>3</sup> ]                              | 2179.24(6)                                                                                    | 1620.0(2)                                                                        | 2668.08(10)                                                                                     |
| Z                                                | 4                                                                                             | 2                                                                                | 2                                                                                               |
| ρ [mg m <sup>-3</sup> ]                          | 2.119                                                                                         | 1.518                                                                            | 1.579                                                                                           |
| μ [mm <sup>-1</sup> ]                            | 6.285                                                                                         | 0.799                                                                            | 0.634                                                                                           |
| F(000)                                           | 1320                                                                                          | 760                                                                              | 1304                                                                                            |
| θ range [°]                                      | 3.00-28.00                                                                                    | 2.66-28.00                                                                       | 2.16-28.00                                                                                      |
| completeness [%]                                 | 99.8                                                                                          | 99.6                                                                             | 99.7                                                                                            |
| reflections measured                             | 58475                                                                                         | 42418                                                                            | 67742                                                                                           |
| unique reflections                               | 5260/                                                                                         | 7816                                                                             | 12833                                                                                           |
| (R <sub>int</sub> )                              | (0.0693)                                                                                      | (0.0632)                                                                         | (0.0719)                                                                                        |
| data/restraints/parameters                       | 5260/2/271                                                                                    | 7816/6/445                                                                       | 12833/101/812                                                                                   |
| GoF on F <sup>2</sup>                            | 1.083                                                                                         | 1.033                                                                            | 1.055                                                                                           |
| final R indices                                  | R1 = 0.0299                                                                                   | R1 = 0.0588                                                                      | R1 = 0.0694                                                                                     |
| [I > 2σ(I)]                                      | ωR2 0.0566                                                                                    | ωR2 = 0.1415                                                                     | ωR2 = 0.2157                                                                                    |
| R indices all data                               | R1 = 0.0299                                                                                   | R1 = 0.0998                                                                      | R1 = 0.1024                                                                                     |
|                                                  | ωR2 = 0.0583                                                                                  | ωR2 = 0.1659                                                                     | ωR2 = 0.2364                                                                                    |
| largest diff. peak and hole [e Å <sup>-3</sup> ] | 1.090/ -1.507                                                                                 | 1.250/ -1.236                                                                    | 3.587/ -2.247                                                                                   |

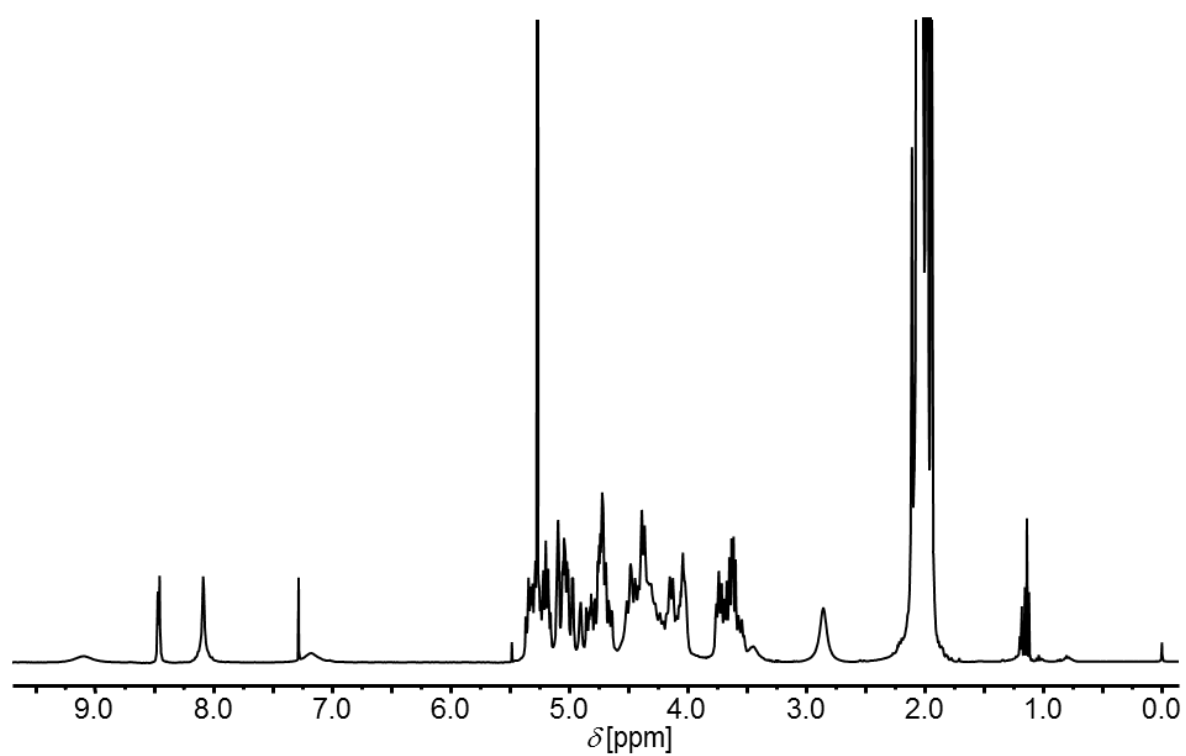

**Figure S1:**  $^1\text{H}$  NMR spectrum (400.1 MHz, in  $\text{CDCl}_3$  at 293 K) of **1**.

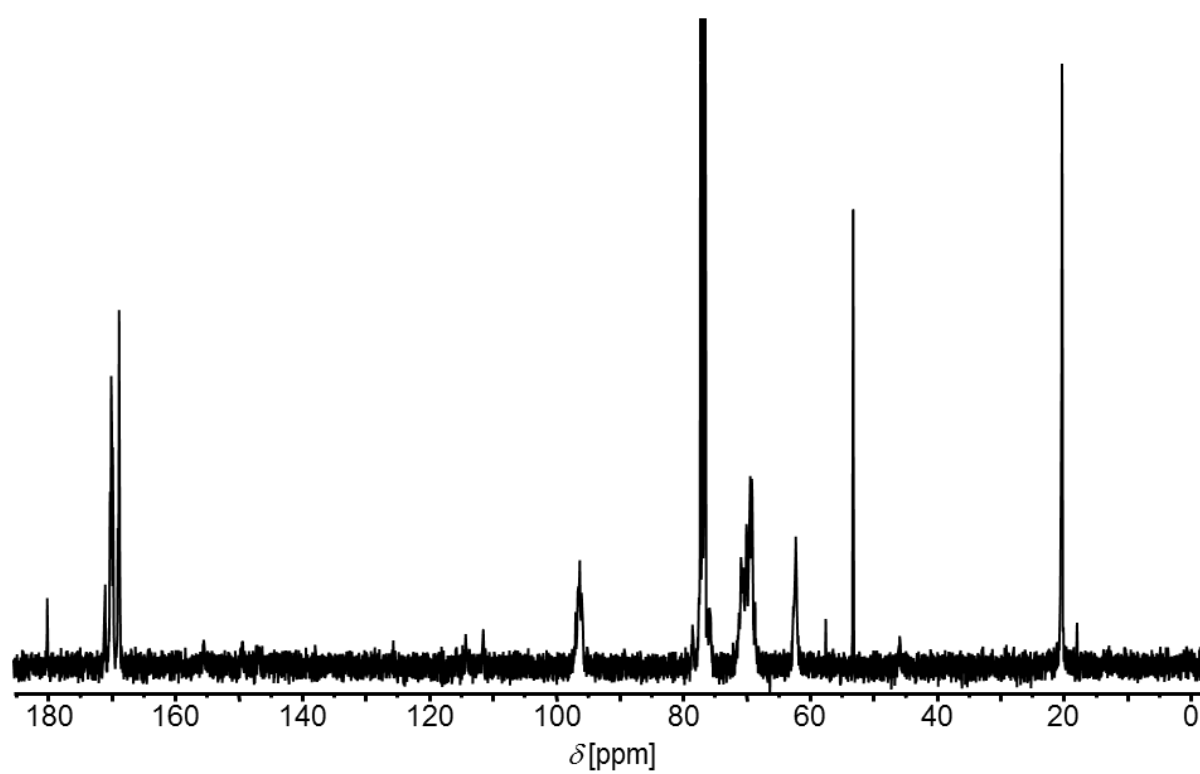

**Figure S2:**  $^{13}\text{C}$  NMR spectrum (100.6 MHz, in  $\text{CDCl}_3$  at 293 K) of **1**.

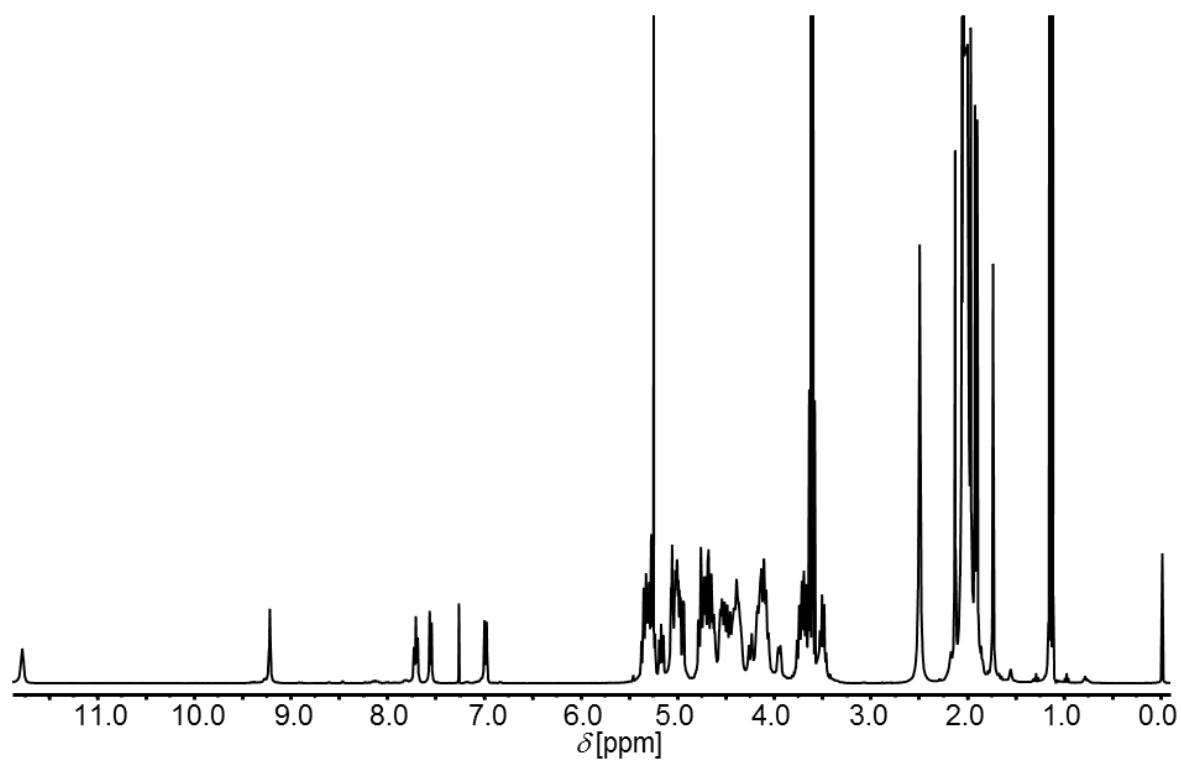

**Figure S3:**  $^1\text{H}$  NMR spectrum (400.1 MHz, in  $\text{CDCl}_3$  at 293 K) of **2**.

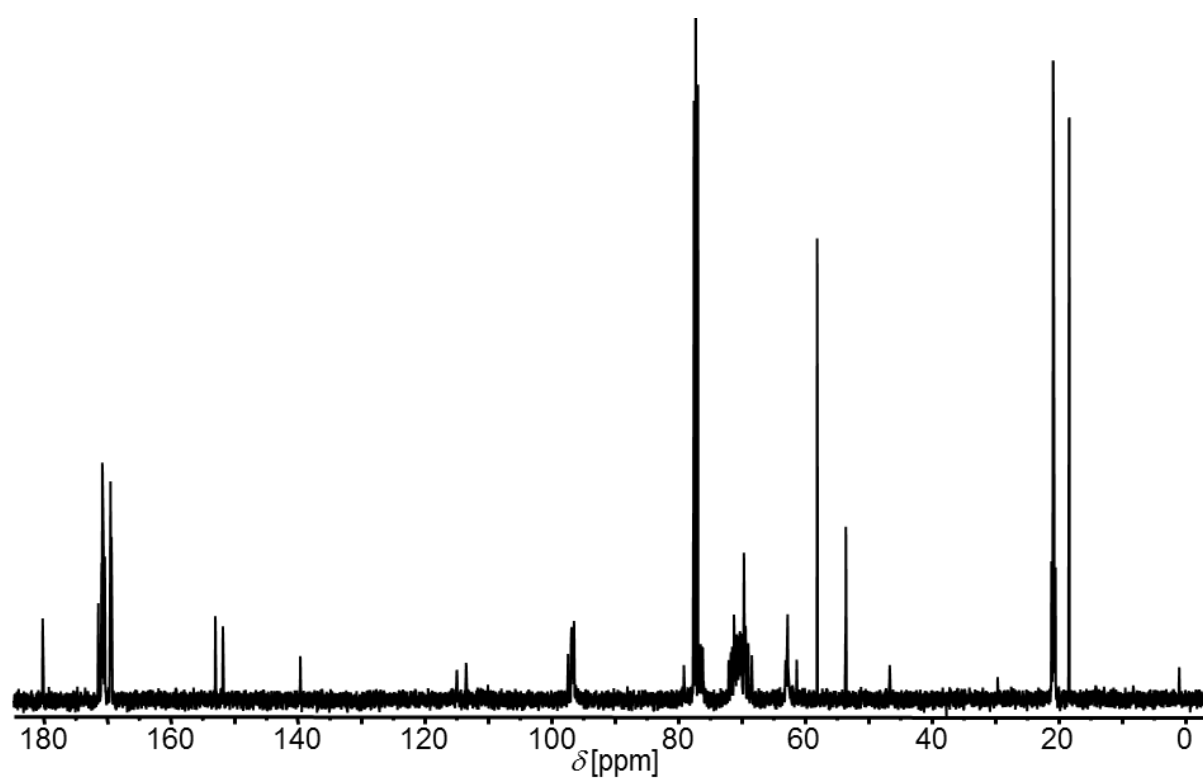

**Figure S4:**  $^{13}\text{C}$  NMR spectrum (100.6 MHz, in  $\text{CDCl}_3$  at 293 K) of **2**.

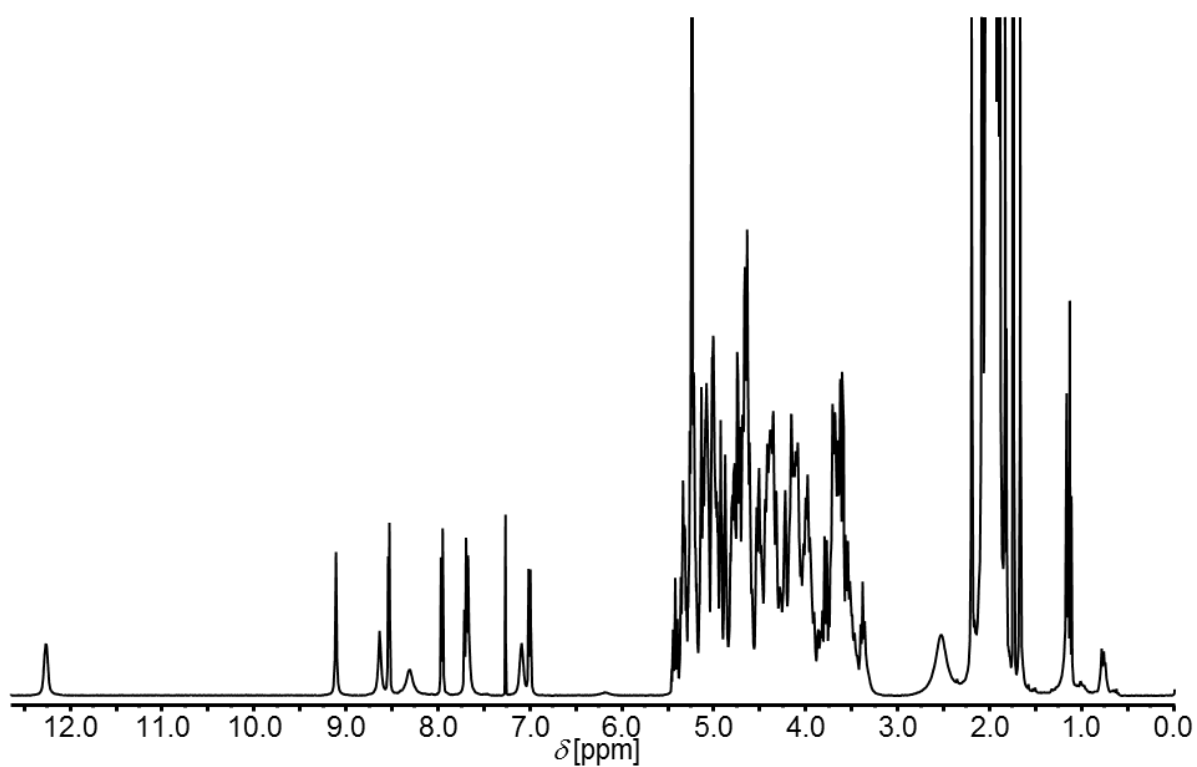

**Figure S5:**  $^1\text{H}$  NMR spectrum (400.1 MHz, in  $\text{CDCl}_3$  at 293 K) of **3**.

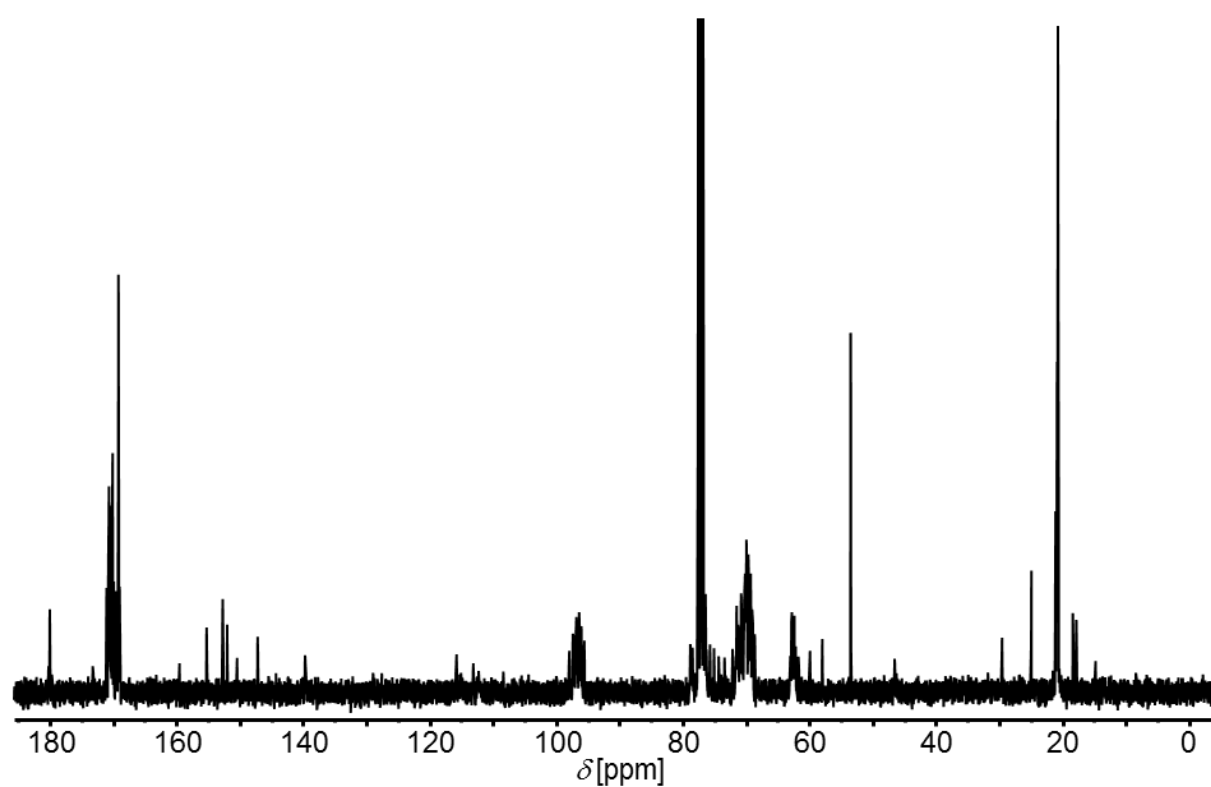

**Figure S6:**  $^{13}\text{C}$  NMR spectrum (100.6 MHz, in  $\text{CDCl}_3$  at 293 K) of **3**.

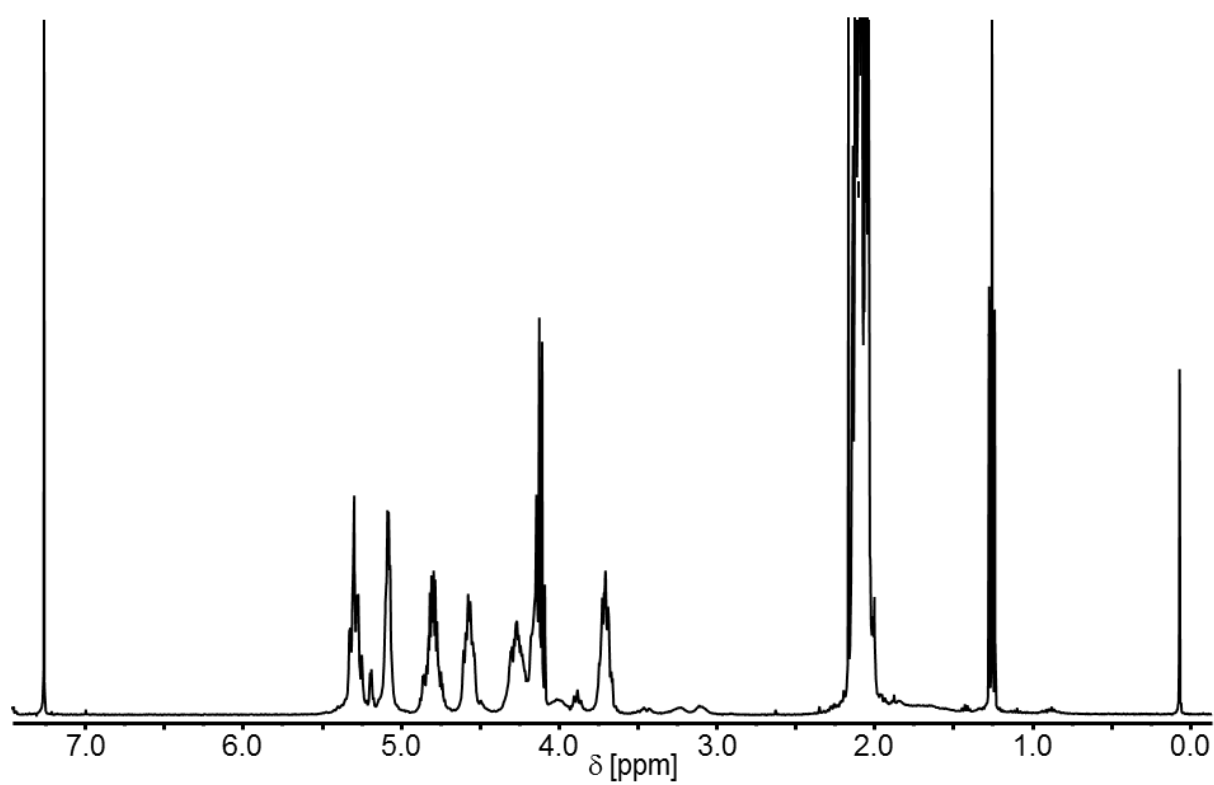

**Figure S7:**  $^1\text{H}$  NMR spectrum (400.1 MHz, in  $\text{CDCl}_3$  at 293 K) of **21**.

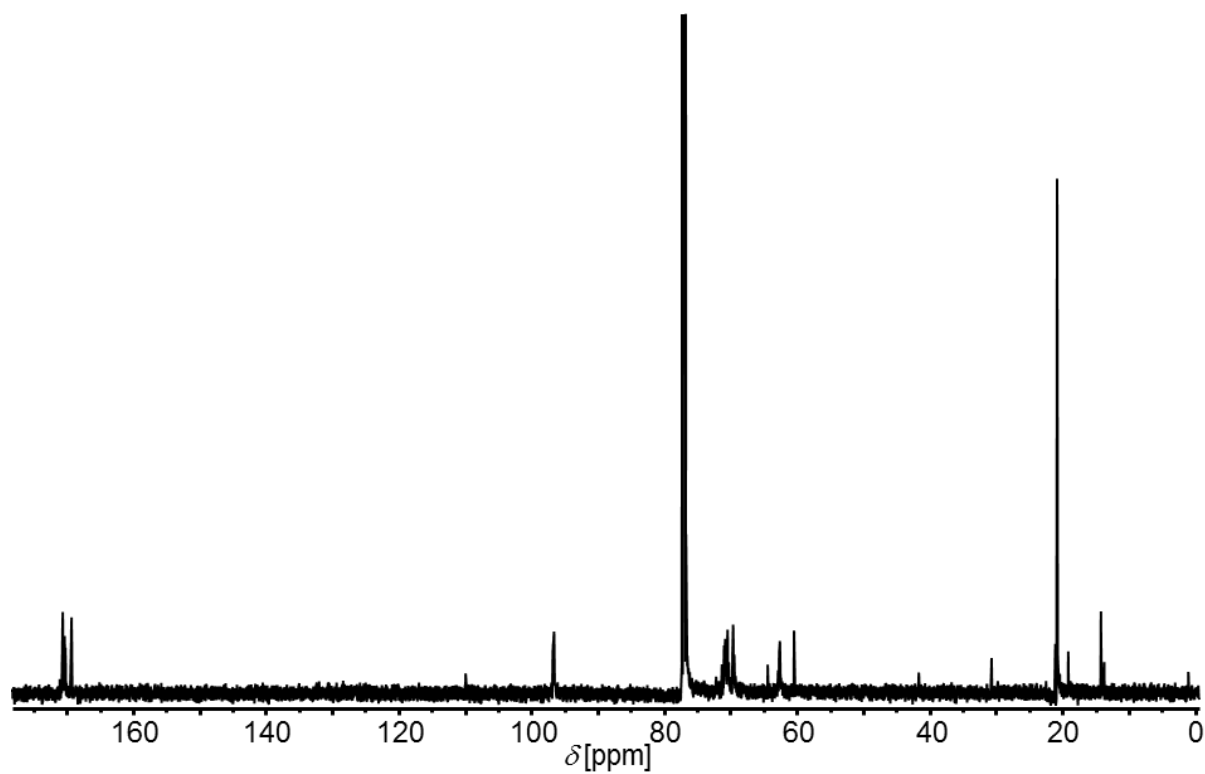

**Figure S8:**  $^{13}\text{C}$  NMR spectrum (100.6 MHz, in  $\text{CDCl}_3$  at 293 K) of **21**.

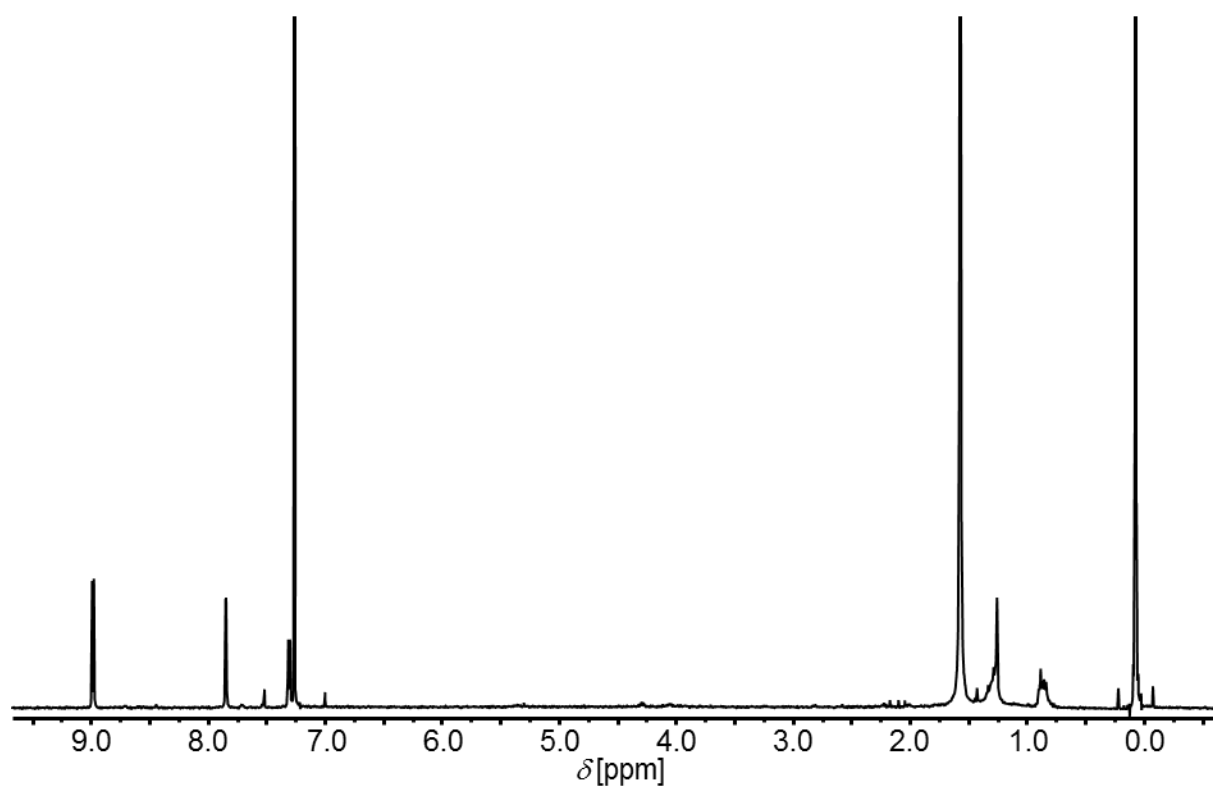

**Figure S9:**  $^1\text{H}$  NMR spectrum (400.1 MHz, in  $\text{CDCl}_3$  at 293 K) of  $[(\text{CO})_3\text{Re}(\mathbf{14})\text{Cl}]$ .

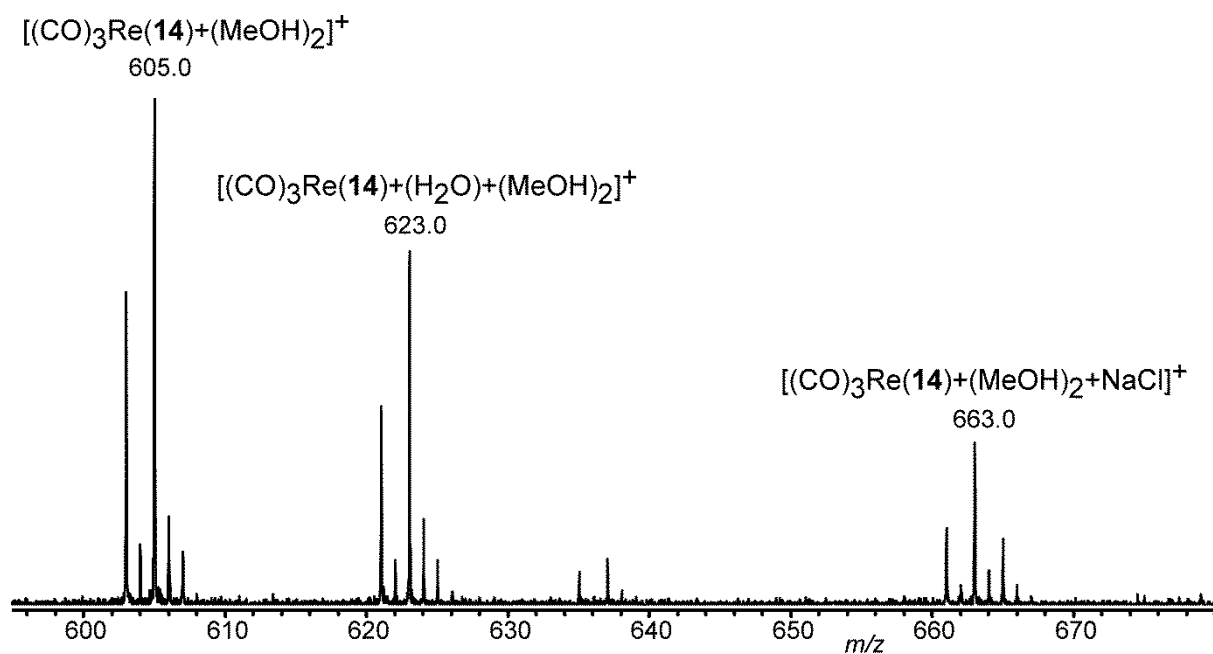

**Figure S10:** ESI-MS (positive mode, sprayed from benzene/acetonitrile 1:1) of  $[(\text{CO})_3\text{Re}(\mathbf{14})\text{Cl}]$ .



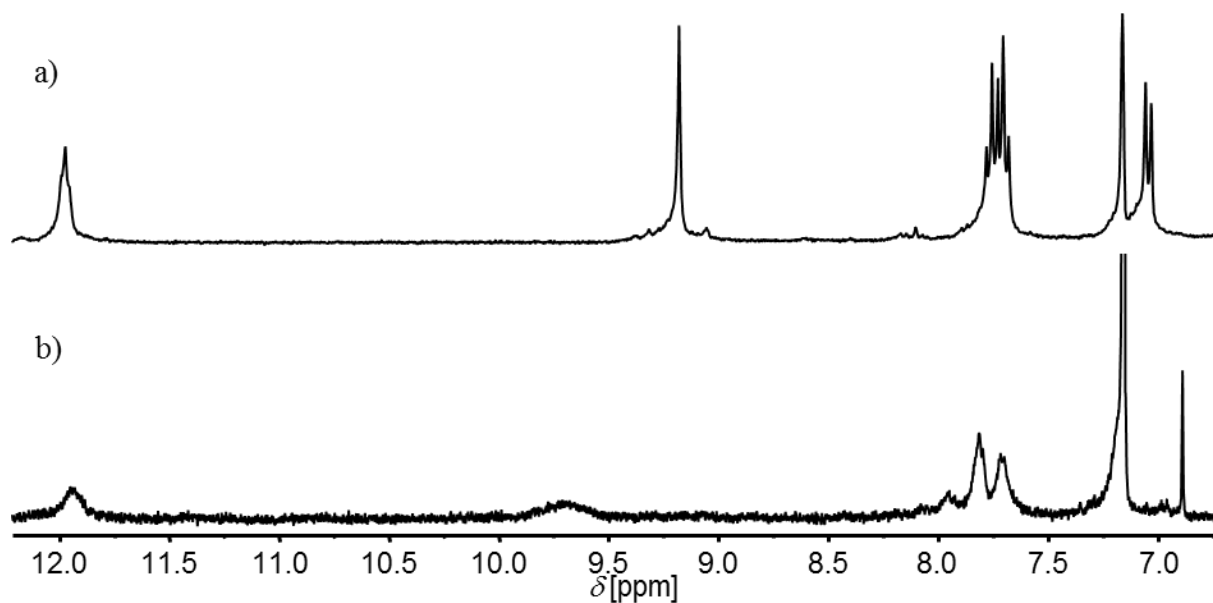

**Figure S11:** Aromatic region of the  $^1\text{H}$  NMR spectra (100.6 MHz, 400.1 MHz, 293 K, benzene- $d_6$ /acetonitrile- $d_3$  1:1) of a) **2** and b)  $[\text{Cu}(\mathbf{2})]\text{PF}_6$ .

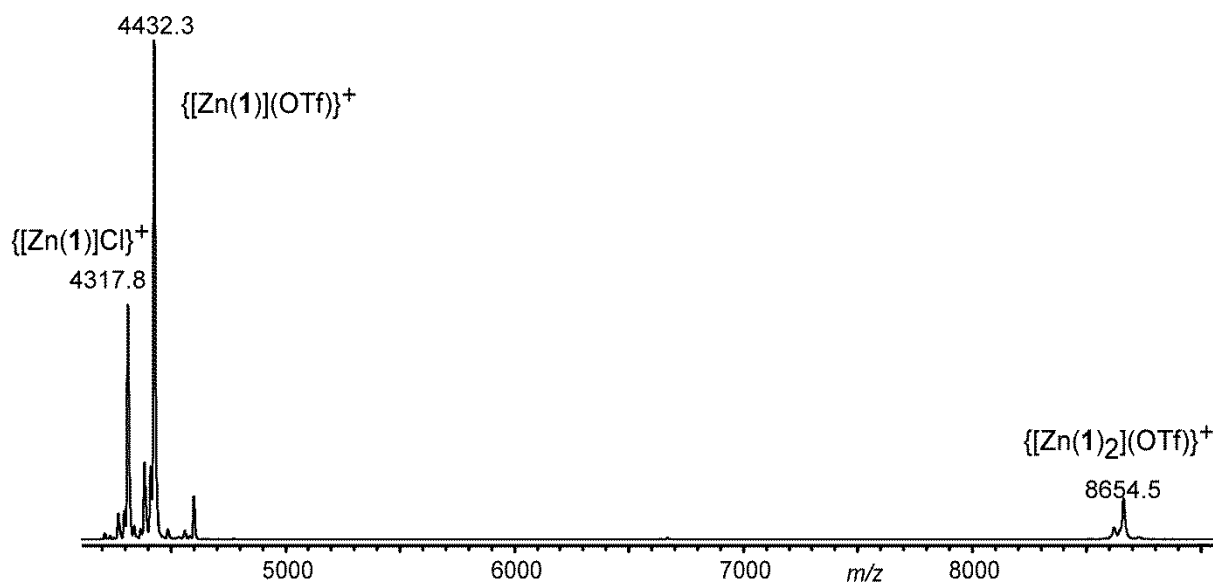

**Figure S12:** MALDI-MS (sample prepared from benzene/acetonitrile (1:1) solution using DCTB as matrix) of  $[\text{Zn}(\mathbf{1})_2](\text{OTf})_2$ .

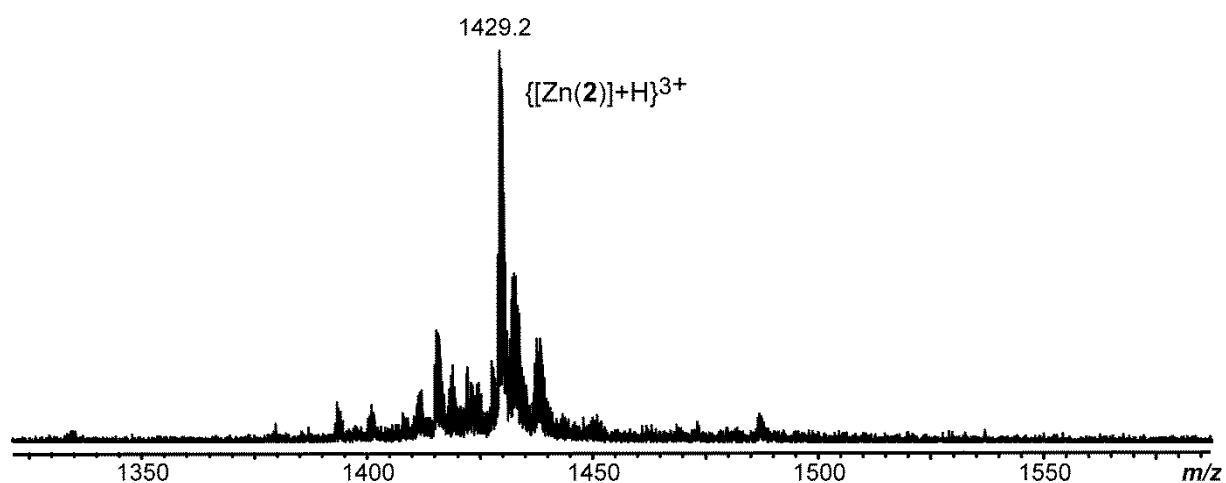

**Figure S13:** ESI-MS (positive mode, sprayed from benzene/acetonitrile 1:1) of  $[\text{Zn}(\mathbf{2})](\text{OTf})_2$ .

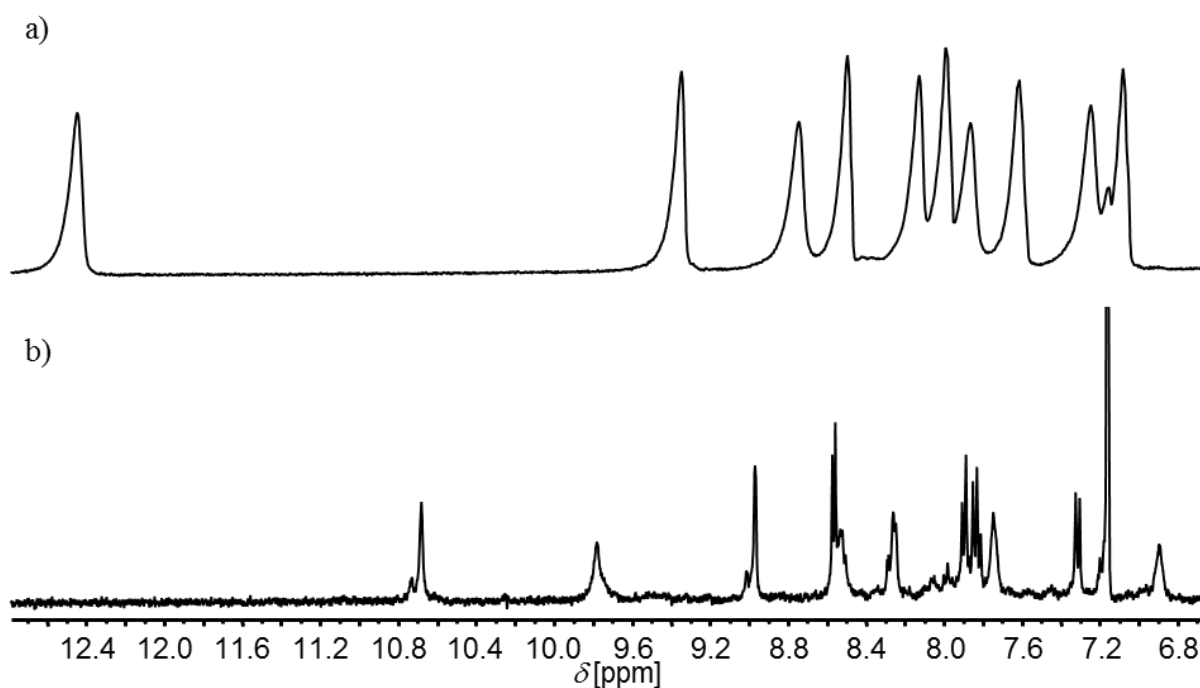

**Figure S14:** Aromatic region of the  $^1\text{H}$  NMR spectra (100.6 MHz, 400.1 MHz, 293 K, benzene- $d_6$ /acetonitrile- $d_3$  1:1) of a)  $\mathbf{3}$  and b) a 1:2 mixture of  $\text{Zn}(\text{OTf})_2$  and  $\mathbf{3}$ .

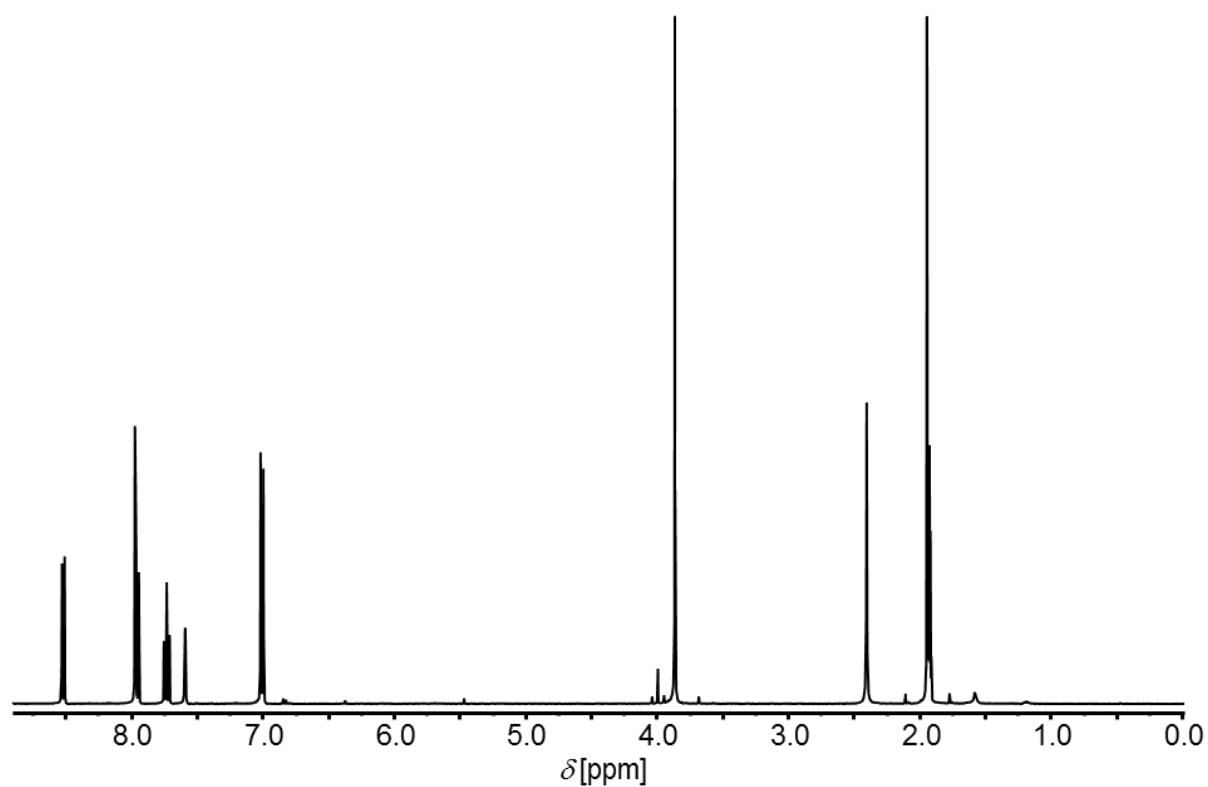

**Figure S15:**  $^1\text{H}$  NMR spectrum (100.6 MHz, 400.1 MHz, 293 K, benzene- $d_6$ /acetonitrile- $d_3$  1:1) of a 1:1 mixture of  $\text{CuPF}_6$  and **22**.

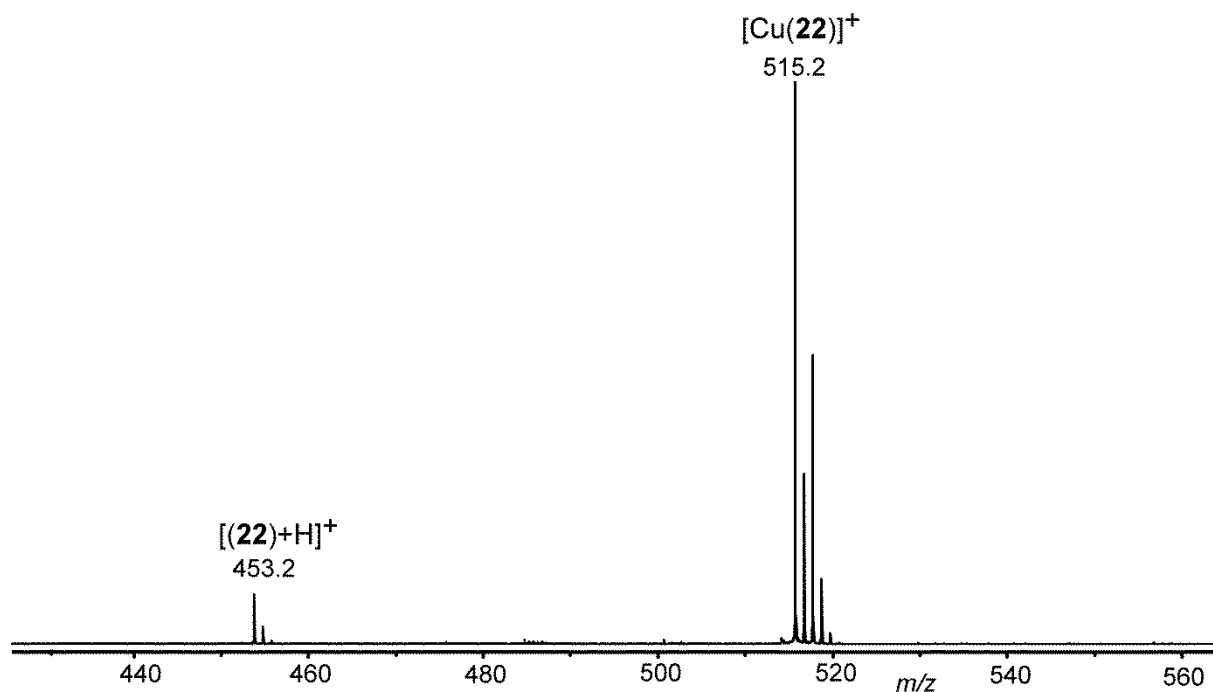

**Figure S16:** MALDI–MS (sample prepared from a benzene/acetonitrile (1:1) solution using DCBT as matrix) of  $[\text{Cu}(\mathbf{22})]\text{PF}_6$ .

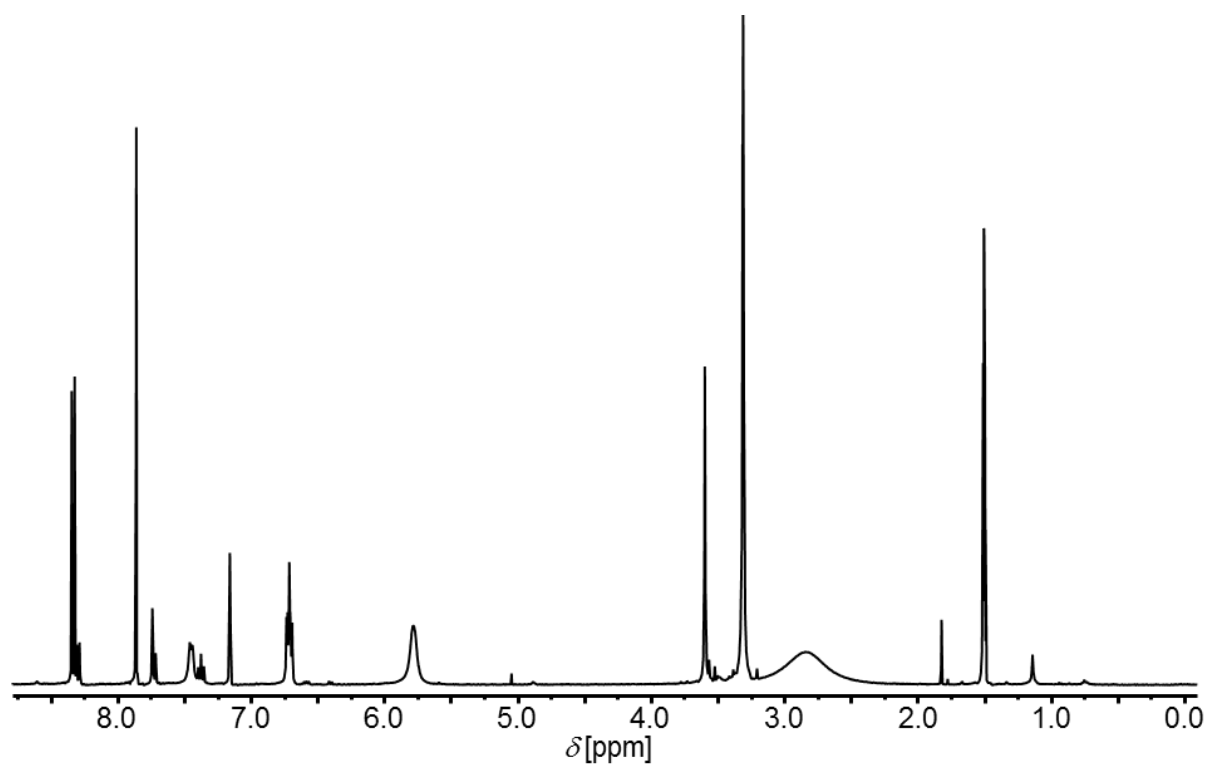

**Figure S17:**  $^1\text{H}$  NMR spectrum (100.6 MHz, 400.1 MHz, 293 K, benzene- $d_6$ /acetonitrile- $d_3$  1:1) of a 1:1 mixture of  $\text{Zn}(\text{OTf})_2$  and **22**.

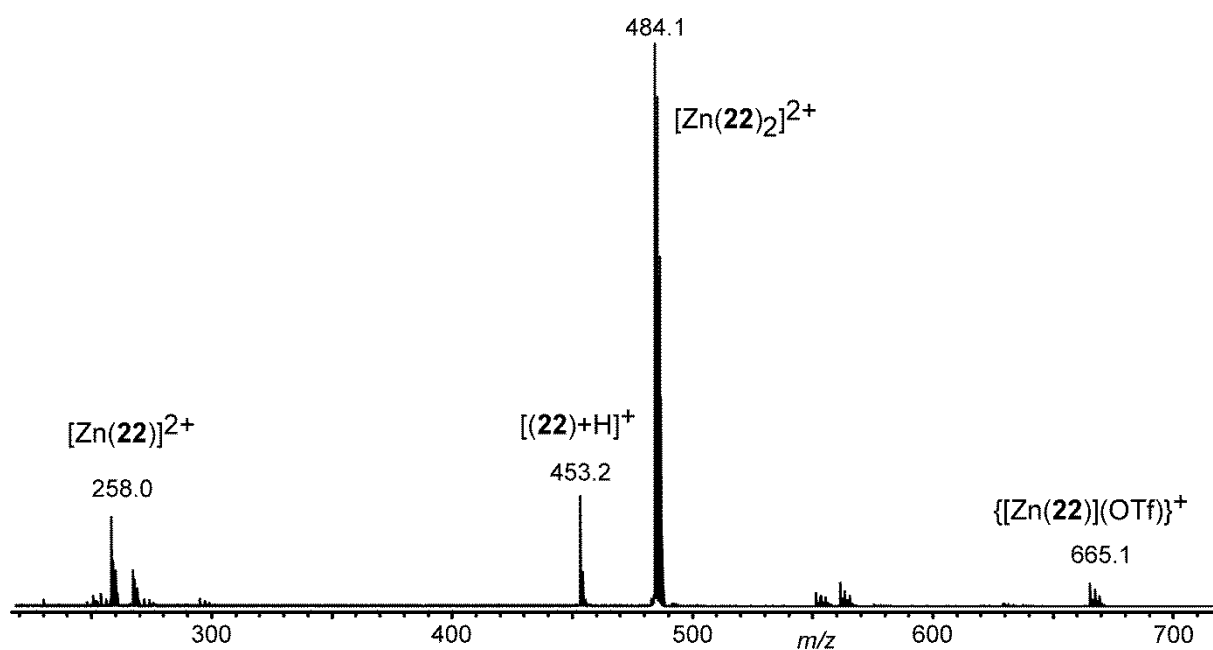

**Figure S18:** ESI-MS (positive mode, sprayed from benzene/acetonitrile 1:1) of  $[\text{Zn}(\mathbf{22})](\text{OTf})_2$ .

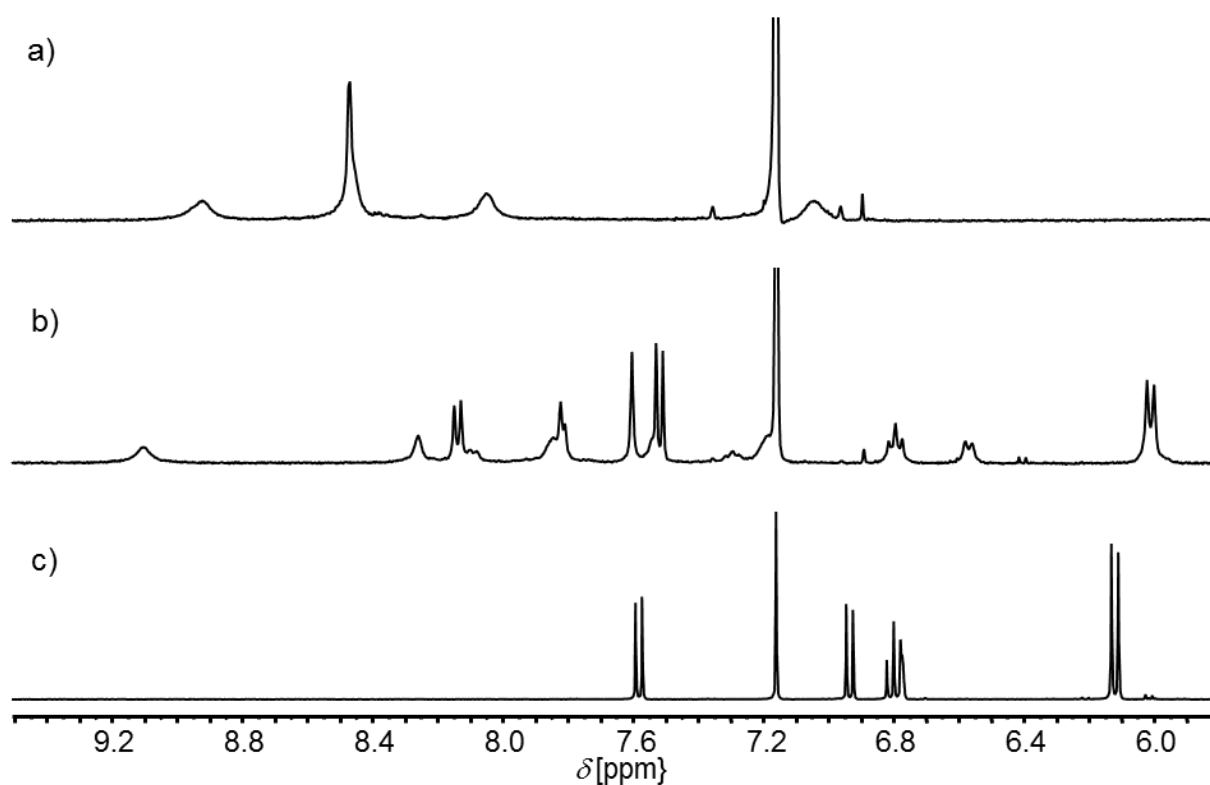

**Figure S19:** Aromatic region of the  $^1\text{H}$  NMR spectra (100.6 MHz, 400.1 MHz, 293 K, benzene- $d_6$ /acetonitrile- $d_3$  1:1) of a) **1**, b) a 1:1:1 mixture of  $\text{CuPF}_6$ , **1**, and **22**, and c) **22**.

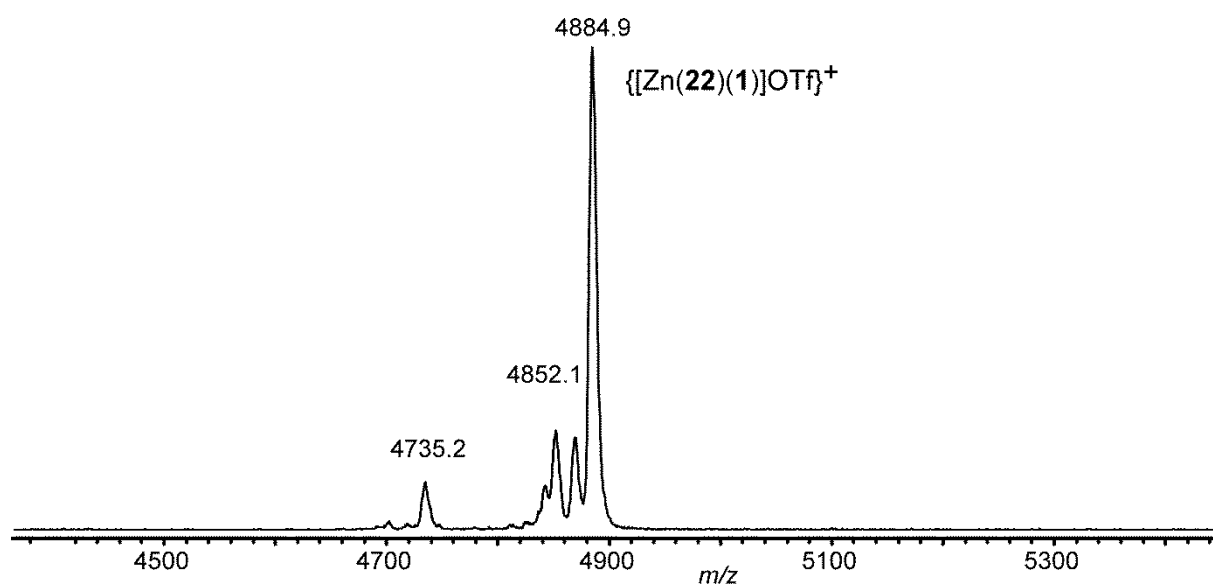

**Figure S20:** MALDI-MS (sample prepared from a benzene/acetonitrile (1:1) solution using DCTB as matrix) of  $[\text{Zn}(\mathbf{22})(\mathbf{1})](\text{OTf})_2$ .
